# Supplementary material for: Comparative Analyses of Lung Transcriptomes in Patients with Alveolar Capillary Dysplasia with Misalignment of Pulmonary Veins and in Foxf1 Heterozygous Knockout Mice
Source: PLoS One. 2014 Apr 10;9(4):e94390. doi: 10.1371/journal.pone.0094390 (PMC3983164; doi:10.1371/journal.pone.0094390)
Supplement: Table S3 — Chemical and genetic perturbation gene sets enriched in ACDMPV lungs: GSEA analysis (fdr <0.05). (XLSX) [file pone.0094390.s004.xlsx]

## Sheet: Sheet1
Table S3: Chemical and genetic perturbation gene sets enriched in ACDMPV lungs.
GSEA analysis (fdr < 0.05).
Gene set description	Genes	Expression in ACDMPV lungs
Genes up-regulated in vascular smooth muscle cells (VSMC) by MAPK8 (JNK1)	HLA-F, CCL20, CCR1, CYBA, KYNU, STXBP2, APOE, DEFB1, ALOX5AP, C1QB, CTSS, TLR4, SIRPA, CD74	downregulated
	C1QC, PLAUR, CCL3, CD53, SERPINA1, UCP2, PFKFB3, HCK, TBXAS1, FGR, C5AR1, CXCR4, FKBP4, CXCL5,
	AQP9, SCNN1G, GNA15, LGALS9, PYGL, SPR
Genes up-regulated in the Kras2LA mouse lung cancer model with mutated KRAS	CYBA, STXBP2, C1QB, CTSS, SIRPA, CD74, C1QC, FKBP4, GLRX, BASP1, CTSD, IFI30, ATP6V0C, ALDOA,	downregulated
	MARCO, HLA-DQB1, MSR1, LAPTM5, ITGB2, TYROBP, ITGAX, LCP1, CD68, FCER1G, CSTB, SNX10, CTSZ,
	GRINA, G6PD, ORM1,
Genes up-regulated in lung tissue upon LPS aspiration with mechanical ventilation (MV)	CCL20, CCR1, CLL3, PLAUR, PFKFB3, C5AR1, TNFAIP3, MXD1, SOD2, MAP3K8, FCERIG, CYBB, SLA, ITGAM	downregulated
compared to control (PBS aspiration without MV).
Genes up-regulated at 3 months of age in lungs from LIPA [GeneID=3988] knockout mice,	CCR1, C1QB, C1QC, NEU1, MSR1, GPNMB, MS4A7, CD68, FCERG, C1QA, ACP5	downregulated
which display pulmonary pathology.
Genes regulated by hypoxia, based on literature searches.	SIRPA, PLAUR, PFKFB3, CXCR4, FKBP4, TNFAIP3, TGM2, ANXA1, ANGPTL4, GLRX, SLC2A1, CTSD, HLA-DQB1	downregulated
Genes up-regulated in HMLE cells (immortalized nontransformed mammary epithelium) after	COL5A2, COL5A1, THY1, IGFBP3, GNG11, COL1A1, COL6A1, COL6A2, COL1A2, MFAP2, CDH11, CDH2,	upregulated
E-cadhedrin (CDH1) knockdown by RNAi.	MAGED1, TCEA2, DARC,
Genes down-regulated in the Kras2LA mouse lung cancer model with mutated KRAS	ANGPTL2, MATN2, NDN, MEF2C, GNG11, SOX11, COL1A1, COL6A2, COL1A2, PRKCDBP, RBP1, HOXB5,	upregulated
	CDH11, MFAP2, ALDH7A1
Genes linked to the ECM maintenance and angiogenesis that were changed in HT1080 cells	COL5A1, COL18A1, COL6A1, COL6A2, MDK, ANGPTL2, MATN2	upregulated
(fibrosarcoma) over-expressing MMP14 compared to those with knockdown of the gene by RNAi.
Genes up-regulated in MMEC cells (myometrial endothelium) by VEGFA stimulation.	COL5A1, THY1, IGFBP3, COL6A1, COl1A2, CD34	upregulated
Genes regulated by hypoxia, based on literature searches.	COL5A2, COL5A1, IGHBP3, IGFBP5, COL4A5, NOS3	upregulated
