# Supplementary material for: Comparative Analyses of Lung Transcriptomes in Patients with Alveolar Capillary Dysplasia with Misalignment of Pulmonary Veins and in Foxf1 Heterozygous Knockout Mice
Source: PLoS One. 2014 Apr 10;9(4):e94390. doi: 10.1371/journal.pone.0094390 (PMC3983164; doi:10.1371/journal.pone.0094390)
Supplement: Table S5 — List of primer sequences used for qRT-PCR validation using SYBR. (XLSX) [file pone.0094390.s006.xlsx]

## Sheet: Sheet1
Table S5: List of primer sequences used for qRT-PCR validation using SYBR.
Gene	Forward primer Sequence	Reverse primer sequence
Cma1	GTGCTGACTGCAGCTCACTG	TTTCCACCTCAAGCTTCTGC
Sema3C	CCGTGCAGAAGGTCGTAGTC	TTTTGGATGAGATTTTCATTGTT
Dll4	TGCCTGGGAAGTATCCTCAC	GAGTCCCTGGGAGAGCAAAT
Hgf	CTGCAGATGAGTGTGCCAAC	CCAGTAGCATCGTTTTCTTGACT
Ren1	TTACCCCTGTCTTTGACCACA	GTCGCTACCTCCTAGCACCA
18S	CGCAGCTAGGAATAATGGAAT	GCCTCAGTTCCGAAAACCAA
