# Supplementary material for: Comparative Analyses of Lung Transcriptomes in Patients with Alveolar Capillary Dysplasia with Misalignment of Pulmonary Veins and in Foxf1 Heterozygous Knockout Mice
Source: PLoS One. 2014 Apr 10;9(4):e94390. doi: 10.1371/journal.pone.0094390 (PMC3983164; doi:10.1371/journal.pone.0094390)
Supplement: Table S8 — GO terms associated with genes similarly altered in both ACDMPV lungs and Foxf1 +/− lungs. (XLSX) [file pone.0094390.s009.xlsx]

## Sheet: Sheet1
Table S8: GO terms associated with genes similarly altered in both ACDMPV lungs and Foxf1+/- lungs.
Gene Symbol	GO term	Upregulated/ downregulated
COL15A1	Angiogenesis, cell adhesion	upregulated
COL18A1	Cell adhesion, angiogenesis	upregulated
COL6A2	Cell adhesion, extracellular matrix organization	upregulated
FSCN1	Cytoskeleton organization, cell proliferation	upregulated
IGFBP3	Regulation of cell growth, regulation of smooth muscle, cell migration	upregulated
MALL	Cholesterol homeostasis, lipd homeostasis	upregulated
MATN2	Axon guidance	upregulated
NOS3	Response to hypoxia, angiogenesis	upregulated
PRKCDBP	Protein kinase C binding	upregulated
RASL11B	Intracellular signaling cascade, small GTPase mediated signal transduction	upregulated
ESM1	Regulation of cell growth	downregulated
GRINA	Muscle contraction, cellular amino acid derivative metabolic process	downregulated
IL1B	Activation of MAPK activity, angiogenesis	downregulated
SIRPA	Cell adhesion, biological adhesion	downregulated
